# Supplementary material
Source: publisher figshare collection journal article supplement (https://sage.figshare.com/ndownloader/files/15367766)
Supplement: Supplementary file 1 [file 15367766]

**Part-time employment as a way to increase women’s employment: (where) does it work?**

**Supplementary Material:**

**Table1: Probit regressions on women’s employment chances**

**Continental cluster**

|  | (1) | (2) |
| --- | --- | --- |
|  | emp |  |
| VARIABLES | coef | se |
|  |  |  |
|  |  |  |
| 2.cntry | -1.965 | (9.328) |
| 3.cntry | -0.378 | (11.16) |
| year | 0.00346 | (0.00419) |
| 1b.cntry#co.year | 0 | (0) |
| 2.cntry#c.year | 0.000665 | (0.00467) |
| 3.cntry#c.year | -3.19e-05 | (0.00557) |
| 1.educ | -29.36*** | (2.523) |
| 2.educ | 29.68*** | (8.446) |
| 1b.cntry#0b.educ | 0 | (0) |
| 1b.cntry#1o.educ | 0 | (0) |
| 1b.cntry#2o.educ | 0 | (0) |
| 2o.cntry#0b.educ | 0 | (0) |
| 2.cntry#1.educ | 24.80*** | (3.842) |
| 2.cntry#2.educ | -33.48*** | (9.508) |
| 3o.cntry#0b.educ | 0 | (0) |
| 3.cntry#1.educ | 7.415 | (7.789) |
| 3.cntry#2.educ | -40.62*** | (12.95) |
| 0b.educ#co.year | 0 | (0) |
| 1.educ#c.year | 0.0148*** | (0.00126) |
| 2.educ#c.year | -0.0144*** | (0.00419) |
| 1b.cntry#0b.educ#co.year | 0 | (0) |
| 1b.cntry#1o.educ#co.year | 0 | (0) |
| 1b.cntry#2o.educ#co.year | 0 | (0) |
| 2o.cntry#0b.educ#co.year | 0 | (0) |
| 2.cntry#1.educ#c.year | -0.0123*** | (0.00192) |
| 2.cntry#2.educ#c.year | 0.0169*** | (0.00472) |
| 3o.cntry#0b.educ#co.year | 0 | (0) |
| 3.cntry#1.educ#c.year | -0.00363 | (0.00388) |
| 3.cntry#2.educ#c.year | 0.0203*** | (0.00645) |
| 2.regio | -0.188*** | (0.00714) |
| 3.regio | -0.119*** | (0.00324) |
| 4.regio | 0.221*** | (0.0197) |
| 5.regio | 0.449*** | (0.0183) |
| 6.regio | 0.0817*** | (0.0219) |
| 7.regio | 0.113*** | (0.0197) |
| 8.regio | 0.0414*** | (0.0157) |
| 9.regio | -0.0278 | (0.0223) |
| 10.regio | 0.127*** | (0.0160) |
| 11.regio | 0.465*** | (0.0247) |
| 12.regio | 0.410*** | (0.0221) |
| 13.regio | 0.181*** | (0.0208) |
| 14o.regio | - |  |
| 15.regio | 0.146*** | (0.0137) |
| 16.regio | 0.121*** | (0.0101) |
| 17.regio | -0.0321*** | (0.00808) |
| 18.regio | 0.0726*** | (0.00381) |
| 19.regio | 0.0295* | (0.0164) |
| 20.regio | 0.109*** | (0.0158) |
| 21.regio | 0.116*** | (0.0132) |
| 22.regio | -0.111*** | (0.00847) |
| 23.regio | 0.00433 | (0.0102) |
| 24.regio | -0.0127 | (0.0122) |
| 25.regio | 0.0714*** | (0.0121) |
| 26.regio | 0.0165 | (0.0112) |
| 27.regio | -0.0192*** | (0.00315) |
| 28.regio | -0.0407*** | (0.00622) |
| 29.regio | 0.0606*** | (0.00923) |
| 30o.regio | - |  |
| 32.age | -0.0135 | (0.0246) |
| 37.age | 0.0213 | (0.0294) |
| 42.age | 0.0673** | (0.0333) |
| migrant | -0.497*** | (0.0531) |
| delta in % reg. PT | 0.992*** | (0.279) |
| delta in % reg. temp. empl. | -1.331*** | (0.506) |
| delta in % reg. self. empl. | 0.114 | (0.301) |
| delta in youth unemp. | -0.153* | (0.0934) |
| Constant | -6.351 | (8.358) |
|  |  |  |
| Observations | 638,167 |  |

**Mediterranean cluster**

|  |  |  |
| --- | --- | --- |
|  |  |  |
| VARIABLES | coef | se |
|  |  |  |
|  |  |  |
| 10.cntry | 27.965*** | (8.517) |
| 12.cntry | 58.813*** | (6.389) |
| Year | 0.032*** | (0.003) |
| 7b.cntry#co.year | 0.000 | (0.000) |
| 10.cntry#c.year | -0.014*** | (0.004) |
| 12.cntry#c.year | -0.029*** | (0.003) |
| 1.educ | 3.734 | (3.058) |
| 2.educ | 34.862*** | (2.240) |
| 7b.cntry#0b.educ | 0.000 | (0.000) |
| 7b.cntry#1o.educ | 0.000 | (0.000) |
| 7b.cntry#2o.educ | 0.000 | (0.000) |
| 10o.cntry#0b.educ | 0.000 | (0.000) |
| 10.cntry#1.educ | -1.682 | (8.774) |
| 10.cntry#2.educ | -1.195 | (11.488) |
| 12o.cntry#0b.educ | 0.000 | (0.000) |
| 12.cntry#1.educ | 14.052*** | (4.574) |
| 12.cntry#2.educ | 13.003** | (5.172) |
| 0b.educ#co.year | 0.000 | (0.000) |
| 1.educ#c.year | -0.002 | (0.002) |
| 2.educ#c.year | -0.017*** | (0.001) |
| 7b.cntry#0b.educ#co.year | 0.000 | (0.000) |
| 7b.cntry#1o.educ#co.year | 0.000 | (0.000) |
| 7b.cntry#2o.educ#co.year | 0.000 | (0.000) |
| 10o.cntry#0b.educ#co.year | 0.000 | (0.000) |
| 10.cntry#1.educ#c.year | 0.001 | (0.004) |
| 10.cntry#2.educ#c.year | 0.001 | (0.006) |
| 12o.cntry#0b.educ#co.year | 0.000 | (0.000) |
| 12.cntry#1.educ#c.year | -0.007*** | (0.002) |
| 12.cntry#2.educ#c.year | -0.006** | (0.003) |
| 51.region | -0.238*** | (0.002) |
| 52.region | -0.181*** | (0.002) |
| 53.region | -0.015*** | (0.005) |
| 54.region | 0.025*** | (0.004) |
| 55.region | -0.006*** | (0.002) |
| 56.region | 0.029*** | (0.002) |
| 57.region | -0.016*** | (0.004) |
| 58.region | -0.146*** | (0.002) |
| 59.region | -0.247*** | (0.003) |
| 60.region | -0.272*** | (0.005) |
| 61.region | 0.175*** | (0.003) |
| 62.region | -0.006*** | (0.002) |
| 63.region | 0.268*** | (0.003) |
| 64.region | -0.369*** | (0.003) |
| 65.region | -0.168*** | (0.002) |
| 66.region | -0.390*** | (0.003) |
| 67.region | -0.062*** | (0.002) |
| 95.region | -0.076*** | (0.006) |
| 96.region | -0.217*** | (0.004) |
| 97.region | -0.356*** | (0.010) |
| 98.region | -0.210*** | (0.006) |
| 99.region | -0.206*** | (0.003) |
| 100.region | -0.037*** | (0.012) |
| 101.region | -0.256*** | (0.006) |
| 102.region | -0.347*** | (0.004) |
| 103.region | -0.114*** | (0.003) |
| 104.region | -0.187*** | (0.006) |
| 105.region | -0.482*** | (0.005) |
| 106.region | -0.239*** | (0.016) |
| 107o.region | - |  |
| 115.region | 0.092*** | (0.005) |
| 116.region | 0.220*** | (0.007) |
| 117.region | -0.156*** | (0.008) |
| 118.region | -0.001 | (0.005) |
| 119.region | -0.044*** | (0.007) |
| 120.region | 0.046*** | (0.007) |
| 121.region | 0.162*** | (0.006) |
| 122.region | -0.073*** | (0.007) |
| 123.region | -0.167*** | (0.008) |
| 124.region | -0.016** | (0.007) |
| 125.region | -0.448*** | (0.010) |
| 126.region | -0.409*** | (0.008) |
| 127.region | -0.540*** | (0.009) |
| 128.region | -0.923*** | (0.011) |
| 129.region | -0.859*** | (0.009) |
| 130.region | -0.747*** | (0.007) |
| 131.region | -0.826*** | (0.011) |
| 132.region | -0.928*** | (0.007) |
| 133.region | -0.592*** | (0.007) |
| 134o.region | - |  |
| 32.age | 0.085*** | (0.015) |
| 37.age | 0.155*** | (0.023) |
| 42.age | 0.176*** | (0.027) |
| migrant | -0.224*** | (0.041) |
| delta in % reg. PT | 1.202*** | (0.260) |
| delta in % reg. temp. empl. | -0.010 | (0.159) |
| delta in % reg. self. empl. | 0.636*** | (0.230) |
| delta in youth unemp. | -0.428*** | (0.054) |
| Constant | -64.996*** | (5.569) |
|  |  |  |
| Observations | 1,520,964 |  |

**France (FR)**

|  | (1) | (2) |
| --- | --- | --- |
|  | emp |  |
| VARIABLES | coef | se |
|  |  |  |
|  |  |  |
| 4o.cntry | - |  |
| year | 0.00450** | (0.00212) |
| 4o.cntry#co.year | 0 | (0) |
| 1.educ | -6.950*** | (2.515) |
| 2.educ | -15.27*** | (4.950) |
| 4o.cntry#0b.educ | 0 | (0) |
| 4o.cntry#1o.educ | 0 | (0) |
| 4o.cntry#2o.educ | 0 | (0) |
| 0b.educ#co.year | 0 | (0) |
| 1.educ#c.year | 0.00370*** | (0.00127) |
| 2.educ#c.year | 0.00806*** | (0.00246) |
| 4o.cntry#0b.educ#co.year | 0 | (0) |
| 4o.cntry#1o.educ#co.year | 0 | (0) |
| 4o.cntry#2o.educ#co.year | 0 | (0) |
| 32.regio | -0.214*** | (0.00963) |
| 33.regio | -0.209*** | (0.0106) |
| 34.regio | -0.180*** | (0.0103) |
| 35.regio | -0.00973 | (0.00835) |
| 36.regio | -0.0604*** | (0.00837) |
| 37.regio | -0.116*** | (0.00914) |
| 38.regio | -0.460*** | (0.00931) |
| 39.regio | -0.246*** | (0.00989) |
| 40.regio | -0.0456*** | (0.00732) |
| 41.regio | -0.117*** | (0.0101) |
| 42.regio | -0.0796*** | (0.00689) |
| 43.regio | -0.0836*** | (0.00613) |
| 44.regio | -0.0794*** | (0.00870) |
| 45.regio | -0.197*** | (0.00552) |
| 46.regio | -0.149*** | (0.00387) |
| 47.regio | 0.0184** | (0.00752) |
| 48.regio | -0.135*** | (0.00422) |
| 49.regio | -0.125*** | (0.00741) |
| 50.regio | -0.367*** | (0.00505) |
| 51.regio | -0.307*** | (0.00574) |
| 52.regio | -0.451*** | (0.0119) |
| 32.age | 0.0496*** | (0.00751) |
| 37.age | 0.208*** | (0.0146) |
| 42.age | 0.354*** | (0.0210) |
| migrant | -0.589*** | (0.0185) |
| delta in % reg. PT | -0.478*** | (0.134) |
| delta in % reg. temp. empl. | -0.233 | (0.234) |
| delta in % reg. self. empl. | -0.243 | (0.538) |
| delta in youth unemp. | -0.292*** | (0.0682) |
| Constant | -8.797** | (4.254) |
|  |  |  |
| Observations | 605,993 |  |

**Liberal cluster (UK)**

|  |  |  |
| --- | --- | --- |
|  |  |  |
| VARIABLES | coef | se |
|  |  |  |
|  |  |  |
| year | -0.009*** | (0.002) |
| 1.educ | -34.319*** | (1.978) |
| 2.educ | -32.115*** | (3.656) |
| 0b.educ#co.year | 0.000 | (0.000) |
| 1.educ#c.year | 0.017*** | (0.001) |
| 2.educ#c.year | 0.017*** | (0.002) |
| 181.region | 0.049*** | (0.001) |
| 182.region | 0.108*** | (0.001) |
| 183.region | 0.016*** | (0.001) |
| 184.region | 0.009** | (0.004) |
| 185.region | 0.094*** | (0.003) |
| 186.region | -0.021*** | (0.002) |
| 187.region | 0.002 | (0.004) |
| 188.region | -0.147*** | (0.002) |
| 32.age | 0.031 | (0.020) |
| 37.age | 0.128*** | (0.038) |
| 42.age | 0.279*** | (0.025) |
| migrant | -0.434*** | (0.031) |
| delta in % reg. PT | -0.013 | (0.598) |
| delta in % reg. temp. empl. | 2.389*** | (0.340) |
| delta in % reg. self. empl. | -1.403 | (0.979) |
| delta in youth unemp. | -0.805*** | (0.141) |
| Constant | 17.117*** | (4.064) |
|  |  |  |
| Observations | 340,683 |  |

**“Post- Socialist”/Eastern cluster**

|  |  |  |
| --- | --- | --- |
|  |  |  |
| VARIABLES | coef | se |
|  |  |  |
|  |  |  |
| 4.cntry | 22.942 | (17.050) |
| 11.cntry | 20.529 | (18.095) |
| 14.cntry | -20.590 | (20.067) |
| 15.cntry | 33.750 | (20.966) |
| 17.cntry | 58.880*** | (19.336) |
| 18.cntry | 63.634*** | (19.617) |
| Year | -0.013* | (0.007) |
| 3b.cntry#co.year | 0.000 | (0.000) |
| 4.cntry#c.year | -0.011 | (0.009) |
| 11.cntry#c.year | -0.010 | (0.009) |
| 14.cntry#c.year | 0.010 | (0.010) |
| 15.cntry#c.year | -0.017 | (0.010) |
| 17.cntry#c.year | -0.029*** | (0.010) |
| 18.cntry#c.year | -0.032*** | (0.010) |
| 1.educ | -49.279*** | (12.159) |
| 2.educ | -40.311* | (22.057) |
| 3b.cntry#0b.educ | 0.000 | (0.000) |
| 3b.cntry#1o.educ | 0.000 | (0.000) |
| 3b.cntry#2o.educ | 0.000 | (0.000) |
| 4o.cntry#0b.educ | 0.000 | (0.000) |
| 4.cntry#1.educ | 14.373 | (14.545) |
| 4.cntry#2.educ | 27.160 | (24.678) |
| 11o.cntry#0b.educ | 0.000 | (0.000) |
| 11.cntry#1.educ | 16.816 | (14.706) |
| 11.cntry#2.educ | 21.166 | (24.670) |
| 14o.cntry#0b.educ | 0.000 | (0.000) |
| 14.cntry#1.educ | 50.196*** | (15.955) |
| 14.cntry#2.educ | 97.001*** | (26.487) |
| 15o.cntry#0b.educ | 0.000 | (0.000) |
| 15.cntry#1.educ | 22.273 | (18.845) |
| 15.cntry#2.educ | -29.739 | (30.301) |
| 17o.cntry#0b.educ | 0.000 | (0.000) |
| 17.cntry#1.educ | -8.978 | (13.175) |
| 17.cntry#2.educ | -1.025 | (26.254) |
| 18o.cntry#0b.educ | 0.000 | (0.000) |
| 18.cntry#1.educ | -6.703 | (17.635) |
| 18.cntry#2.educ | 11.466 | (36.524) |
| 0b.educ#co.year | 0.000 | (0.000) |
| 1.educ#c.year | 0.025*** | (0.006) |
| 2.educ#c.year | 0.021* | (0.011) |
| 3b.cntry#0b.educ#co.year | 0.000 | (0.000) |
| 3b.cntry#1o.educ#co.year | 0.000 | (0.000) |
| 3b.cntry#2o.educ#co.year | 0.000 | (0.000) |
| 4o.cntry#0b.educ#co.year | 0.000 | (0.000) |
| 4.cntry#1.educ#c.year | -0.007 | (0.007) |
| 4.cntry#2.educ#c.year | -0.014 | (0.012) |
| 11o.cntry#0b.educ#co.year | 0.000 | (0.000) |
| 11.cntry#1.educ#c.year | -0.008 | (0.007) |
| 11.cntry#2.educ#c.year | -0.011 | (0.012) |
| 14o.cntry#0b.educ#co.year | 0.000 | (0.000) |
| 14.cntry#1.educ#c.year | -0.025*** | (0.008) |
| 14.cntry#2.educ#c.year | -0.048*** | (0.013) |
| 15o.cntry#0b.educ#co.year | 0.000 | (0.000) |
| 15.cntry#1.educ#c.year | -0.011 | (0.009) |
| 15.cntry#2.educ#c.year | 0.015 | (0.015) |
| 17o.cntry#0b.educ#co.year | 0.000 | (0.000) |
| 17.cntry#1.educ#c.year | 0.004 | (0.007) |
| 17.cntry#2.educ#c.year | 0.000 | (0.013) |
| 18o.cntry#0b.educ#co.year | 0.000 | (0.000) |
| 18.cntry#1.educ#c.year | 0.003 | (0.009) |
| 18.cntry#2.educ#c.year | -0.006 | (0.018) |
| 16.region | 0.015*** | (0.003) |
| 17.region | 0.012*** | (0.003) |
| 18.region | 0.291*** | (0.007) |
| 19.region | 0.155*** | (0.006) |
| 20.region | 0.111*** | (0.005) |
| 21.region | 0.151*** | (0.006) |
| 22.region | 0.077*** | (0.003) |
| 23.region | 0.155*** | (0.003) |
| 24.region | 0.038*** | (0.004) |
| 25.region | 0.096*** | (0.002) |
| 26.region | 0.052*** | (0.002) |
| 27.region | 0.057*** | (0.003) |
| 28o.region | - |  |
| 108.region | 0.090*** | (0.011) |
| 109.region | 0.143*** | (0.005) |
| 110.region | 0.186*** | (0.004) |
| 111.region | -0.033*** | (0.005) |
| 112.region | -0.116*** | (0.003) |
| 113.region | -0.144*** | (0.005) |
| 114o.region | - |  |
| 142.region | 0.299*** | (0.004) |
| 143.region | 0.227*** | (0.004) |
| 144.region | 0.229*** | (0.004) |
| 145.region | 0.012*** | (0.002) |
| 146.region | 0.302*** | (0.003) |
| 147.region | 0.156*** | (0.004) |
| 148.region | 0.191*** | (0.004) |
| 149.region | 0.332*** | (0.007) |
| 150.region | 0.157*** | (0.001) |
| 151.region | -0.003 | (0.003) |
| 152.region | 0.098*** | (0.004) |
| 153.region | 0.096*** | (0.004) |
| 154.region | 0.088*** | (0.005) |
| 155.region | 0.140*** | (0.004) |
| 156.region | 0.073*** | (0.004) |
| 157o.region | - |  |
| 158.region | 0.096*** | (0.012) |
| 159.region | -0.260*** | (0.012) |
| 160.region | -0.083*** | (0.013) |
| 161.region | -0.117*** | (0.009) |
| 162.region | -0.064*** | (0.011) |
| 163.region | -0.042*** | (0.010) |
| 164.region | -0.131*** | (0.012) |
| 165o.region | - |  |
| 174.region | -0.207*** | (0.004) |
| 175o.region | - |  |
| 176.region | 0.385*** | (0.014) |
| 177.region | 0.201*** | (0.002) |
| 178.region | 0.037*** | (0.002) |
| 179o.region | - |  |
| 32.age | 0.274*** | (0.019) |
| 37.age | 0.559*** | (0.035) |
| 42.age | 0.684*** | (0.051) |
| delta in % reg. PT | -0.303 | (0.396) |
| delta in % reg. temp. empl. | 0.159 | (0.300) |
| delta in % reg. self. empl. | -0.032 | (0.194) |
| delta in youth unemp. | -0.579*** | (0.094) |
| Constant | 25.258* | (15.043) |
|  |  |  |
| Observations | 1,126,911 |  |

**Nordic “Socialdemocratic” cluster**

|  |  |  |
| --- | --- | --- |
|  |  |  |
| VARIABLES | coef | se |
|  |  |  |
|  |  |  |
| 8.cntry | -106.636*** | (25.287) |
| 13.cntry | -121.568*** | (24.348) |
| 16.cntry | -101.277*** | (25.281) |
| year | -0.056*** | (0.012) |
| 6b.cntry#co.year | 0.000 | (0.000) |
| 8.cntry#c.year | 0.053*** | (0.013) |
| 13.cntry#c.year | 0.061*** | (0.012) |
| 16.cntry#c.year | 0.050*** | (0.013) |
| 1.educ | -32.973 | (20.601) |
| 2.educ | -63.059** | (31.876) |
| 6b.cntry#0b.educ | 0.000 | (0.000) |
| 6b.cntry#1o.educ | 0.000 | (0.000) |
| 6b.cntry#2o.educ | 0.000 | (0.000) |
| 8o.cntry#0b.educ | 0.000 | (0.000) |
| 8.cntry#1.educ | 8.626 | (23.431) |
| 8.cntry#2.educ | 54.198 | (33.094) |
| 13o.cntry#0b.educ | 0.000 | (0.000) |
| 13.cntry#1.educ | 28.074 | (22.092) |
| 13.cntry#2.educ | 41.076 | (33.319) |
| 16o.cntry#0b.educ | 0.000 | (0.000) |
| 16.cntry#1.educ | 9.512 | (22.421) |
| 16.cntry#2.educ | 22.496 | (32.847) |
| 0b.educ#co.year | 0.000 | (0.000) |
| 1.educ#c.year | 0.017 | (0.010) |
| 2.educ#c.year | 0.032** | (0.016) |
| 6b.cntry#0b.educ#co.year | 0.000 | (0.000) |
| 6b.cntry#1o.educ#co.year | 0.000 | (0.000) |
| 6b.cntry#2o.educ#co.year | 0.000 | (0.000) |
| 8o.cntry#0b.educ#co.year | 0.000 | (0.000) |
| 8.cntry#1.educ#c.year | -0.004 | (0.012) |
| 8.cntry#2.educ#c.year | -0.027 | (0.016) |
| 13o.cntry#0b.educ#co.year | 0.000 | (0.000) |
| 13.cntry#1.educ#c.year | -0.014 | (0.011) |
| 13.cntry#2.educ#c.year | -0.020 | (0.017) |
| 16o.cntry#0b.educ#co.year | 0.000 | (0.000) |
| 16.cntry#1.educ#c.year | -0.005 | (0.011) |
| 16.cntry#2.educ#c.year | -0.011 | (0.016) |
| 46.region | 0.131*** | (0.007) |
| 47.region | 0.044*** | (0.006) |
| 48.region | 0.033*** | (0.005) |
| 49.region | 0.001 | (0.006) |
| 68.region | 0.120*** | (0.003) |
| 69.region | -0.127*** | (0.002) |
| 70.region | -0.125*** | (0.003) |
| 71.region | 0.416*** | (0.009) |
| 72o.region | - |  |
| 135.region | 0.097*** | (0.007) |
| 136.region | 0.048*** | (0.001) |
| 137.region | 0.017*** | (0.003) |
| 138.region | -0.035*** | (0.003) |
| 139.region | 0.042*** | (0.003) |
| 140.region | -0.015*** | (0.002) |
| 141o.region | - |  |
| 166.region | 0.165*** | (0.007) |
| 167.region | 0.127*** | (0.008) |
| 168.region | 0.261*** | (0.009) |
| 169.region | 0.058*** | (0.004) |
| 170.region | 0.052*** | (0.007) |
| 171.region | 0.008** | (0.004) |
| 172.region | 0.021*** | (0.002) |
| 173o.region | - |  |
| 32.age | 0.183*** | (0.022) |
| 37.age | 0.345*** | (0.022) |
| 42.age | 0.485*** | (0.030) |
| migrant | -0.556*** | (0.035) |
| delta in % reg. PT | -0.369* | (0.198) |
| delta in % reg. temp. empl. | 0.133 | (0.239) |
| delta in % reg. self. empl. | -1.184* | (0.609) |
| delta in youth unemp. | -0.344** | (0.139) |
| Constant | 113.335*** | (23.968) |
|  |  |  |
| Observations | 559,599 |  |

**Table 2: Probit models on women’s employment chances – Models with interactions**

**Continental cluster –Models with interaction for educational attainment**

|  | (1) | (2) |
| --- | --- | --- |
|  | emp |  |
| VARIABLES | coef | se |
|  |  |  |
|  |  |  |
| 2.cntry | -8.742 | (7.577) |
| 3.cntry | -10.03 | (9.937) |
| year | -0.00396 | (0.00323) |
| 1b.cntry#co.year | 0 | (0) |
| 2.cntry#c.year | 0.00402 | (0.00379) |
| 3.cntry#c.year | 0.00477 | (0.00496) |
| 1.educ | -48.77*** | (8.108) |
| 2.educ | 21.79 | (13.46) |
| 1b.cntry#0b.educ | 0 | (0) |
| 1b.cntry#1o.educ | 0 | (0) |
| 1b.cntry#2o.educ | 0 | (0) |
| 2o.cntry#0b.educ | 0 | (0) |
| 2.cntry#1.educ | 31.59*** | (4.052) |
| 2.cntry#2.educ | -30.73*** | (9.062) |
| 3o.cntry#0b.educ | 0 | (0) |
| 3.cntry#1.educ | 19.94** | (8.488) |
| 3.cntry#2.educ | -38.22*** | (13.05) |
| 0b.educ#co.year | 0 | (0) |
| 1.educ#c.year | 0.0245*** | (0.00403) |
| 2.educ#c.year | -0.0105 | (0.00670) |
| 1b.cntry#0b.educ#co.year | 0 | (0) |
| 1b.cntry#1o.educ#co.year | 0 | (0) |
| 1b.cntry#2o.educ#co.year | 0 | (0) |
| 2o.cntry#0b.educ#co.year | 0 | (0) |
| 2.cntry#1.educ#c.year | -0.0156*** | (0.00201) |
| 2.cntry#2.educ#c.year | 0.0155*** | (0.00450) |
| 3o.cntry#0b.educ#co.year | 0 | (0) |
| 3.cntry#1.educ#c.year | -0.00989** | (0.00422) |
| 3.cntry#2.educ#c.year | 0.0191*** | (0.00649) |
| 2.regio | -0.180*** | (0.00974) |
| 3.regio | -0.0750*** | (0.00595) |
| 4.regio | 0.256*** | (0.0277) |
| 5.regio | 0.491*** | (0.0262) |
| 6.regio | 0.154*** | (0.0296) |
| 7.regio | 0.212*** | (0.0303) |
| 8.regio | 0.0874*** | (0.0213) |
| 9.regio | 0.0185 | (0.0272) |
| 10.regio | 0.198*** | (0.0235) |
| 11.regio | 0.542*** | (0.0349) |
| 12.regio | 0.465*** | (0.0309) |
| 13.regio | 0.228*** | (0.0305) |
| 14o.regio | - |  |
| 15.regio | 0.194*** | (0.0112) |
| 16.regio | 0.151*** | (0.00903) |
| 17.regio | -0.111*** | (0.0165) |
| 18.regio | 0.0686*** | (0.00390) |
| 19.regio | -0.0211 | (0.0214) |
| 20.regio | 0.0455** | (0.0221) |
| 21.regio | 0.129*** | (0.0128) |
| 22.regio | -0.126*** | (0.00819) |
| 23.regio | 0.0290*** | (0.0101) |
| 24.regio | -0.00326 | (0.0121) |
| 25.regio | 0.103*** | (0.0111) |
| 26.regio | 0.0176 | (0.0115) |
| 27.regio | -0.0105*** | (0.00327) |
| 28.regio | -0.0537*** | (0.00590) |
| 29.regio | 0.0693*** | (0.00964) |
| 30o.regio | - |  |
| 32.age | 0.0909*** | (0.0195) |
| 37.age | 0.0922*** | (0.0274) |
| 42.age | 0.0700** | (0.0331) |
| migrant | -0.452*** | (0.0559) |
| parent | 0.225*** | (0.0385) |
| 2.child | -0.135*** | (0.0202) |
| 3.child | -0.378*** | (0.0490) |
| 4.child | -0.362*** | (0.0290) |
| 5.child | -0.726*** | (0.0488) |
| 2.staciv | 0.111** | (0.0563) |
| 3.staciv | 0.00564 | (0.0183) |
| 4.staciv | 0.167*** | (0.0542) |
| 5.staciv | -0.0576 | (0.0431) |
| delta in % reg. PT | 1.556*** | (0.328) |
| 0b.educ# delta in % reg. PT | 0 | (0) |
| 1.educ# delta in % reg. PT | -0.915*** | (0.323) |
| 2.educ# delta in % reg. PT | -0.583 | (0.419) |
| delta in % reg. temp. empl. | -1.439*** | (0.469) |
| delta in % reg. self. empl. | 0.183 | (0.300) |
| delta in youth unemp. | -0.156* | (0.0895) |
| Constant | 8.791 | (6.472) |
|  |  |  |
| Observations | 638,167 |  |

**Continental cluster –Models with interaction for presence of children**

|  | (1) | (2) |
| --- | --- | --- |
|  | emp |  |
| VARIABLES | coef | se |
|  |  |  |
| emp |  |  |
| 2.cntry | -8.805 | (7.646) |
| 3.cntry | -8.247 | (10.28) |
| year | 0.00938 | (0.00625) |
| 1b.cntry#co.year | 0 | (0) |
| 2.cntry#c.year | 0.00407 | (0.00383) |
| 3.cntry#c.year | 0.00389 | (0.00513) |
| 1.educ | -34.54*** | (3.263) |
| 2.educ | 19.55** | (7.624) |
| 1b.cntry#0b.educ | 0 | (0) |
| 1b.cntry#1o.educ | 0 | (0) |
| 1b.cntry#2o.educ | 0 | (0) |
| 2o.cntry#0b.educ | 0 | (0) |
| 2.cntry#1.educ | 28.18*** | (4.266) |
| 2.cntry#2.educ | -29.02*** | (8.569) |
| 3o.cntry#0b.educ | 0 | (0) |
| 3.cntry#1.educ | 12.79 | (8.251) |
| 3.cntry#2.educ | -40.75*** | (12.85) |
| 0b.educ#co.year | 0 | (0) |
| 1.educ#c.year | 0.0174*** | (0.00162) |
| 2.educ#c.year | -0.00940** | (0.00378) |
| 1b.cntry#0b.educ#co.year | 0 | (0) |
| 1b.cntry#1o.educ#co.year | 0 | (0) |
| 1b.cntry#2o.educ#co.year | 0 | (0) |
| 2o.cntry#0b.educ#co.year | 0 | (0) |
| 2.cntry#1.educ#c.year | -0.0140*** | (0.00213) |
| 2.cntry#2.educ#c.year | 0.0147*** | (0.00425) |
| 3o.cntry#0b.educ#co.year | 0 | (0) |
| 3.cntry#1.educ#c.year | -0.00632 | (0.00410) |
| 3.cntry#2.educ#c.year | 0.0204*** | (0.00639) |
| 2.child | -13.57 | (9.914) |
| 3.child | 71.80*** | (14.88) |
| 4.child | 2.093 | (13.81) |
| 5.child | 67.29*** | (13.19) |
| o.year | - |  |
| 1b.child#co.year | 0 | (0) |
| 2.child#c.year | 0.00671 | (0.00495) |
| 3.child#c.year | -0.0360*** | (0.00744) |
| 4.child#c.year | -0.00121 | (0.00690) |
| 5.child#c.year | -0.0339*** | (0.00660) |
| 2.regio | -0.178*** | (0.0104) |
| 3.regio | -0.0743*** | (0.00572) |
| 4.regio | 0.250*** | (0.0264) |
| 5.regio | 0.488*** | (0.0250) |
| 6.regio | 0.147*** | (0.0278) |
| 7.regio | 0.199*** | (0.0275) |
| 8.regio | 0.0790*** | (0.0198) |
| 9.regio | 0.0119 | (0.0261) |
| 10.regio | 0.191*** | (0.0216) |
| 11.regio | 0.533*** | (0.0325) |
| 12.regio | 0.460*** | (0.0292) |
| 13.regio | 0.222*** | (0.0288) |
| 14o.regio | - |  |
| 15.regio | 0.198*** | (0.0118) |
| 16.regio | 0.154*** | (0.00954) |
| 17.regio | -0.104*** | (0.0156) |
| 18.regio | 0.0691*** | (0.00345) |
| 19.regio | -0.0148 | (0.0209) |
| 20.regio | 0.0457* | (0.0235) |
| 21.regio | 0.132*** | (0.0132) |
| 22.regio | -0.119*** | (0.00813) |
| 23.regio | 0.0294*** | (0.0106) |
| 24.regio | -0.00253 | (0.0127) |
| 25.regio | 0.106*** | (0.0113) |
| 26.regio | 0.0213* | (0.0119) |
| 27.regio | -0.00737** | (0.00313) |
| 28.regio | -0.0466*** | (0.00599) |
| 29.regio | 0.0687*** | (0.0104) |
| 30o.regio | - |  |
| 32.age | 0.103*** | (0.0197) |
| 37.age | 0.109*** | (0.0267) |
| 42.age | 0.0766** | (0.0319) |
| migrant | -0.452*** | (0.0558) |
| parent | 0.234*** | (0.0378) |
| 2.staciv | 0.110* | (0.0567) |
| 3.staciv | 0.0138 | (0.0176) |
| 4.staciv | 0.186*** | (0.0545) |
| 5.staciv | -0.0531 | (0.0429) |
| delta of % regional PT | -0.605 | (0.579) |
| 1b.child#co.delta of % regional PT | 0.425 | (0.546) |
| 2.child#c.delta of % regional PT | 1.521** | (0.722) |
| 3.child#c.delta of % regional PT | 2.440*** | (0.734) |
| 4.child#c.delta of % regional PT | 2.505*** | (0.610) |
| 5.child#c.delta of % regional PT | -1.398*** | (0.456) |
| delta of % regional temp. empl | 0.267 | (0.302) |
| delta of % regional self empl | -0.175** | (0.0861) |
| Constant | -17.97 | (12.48) |
|  |  |  |
| Observations | 638,167 |  |
|  |  |  |

**Mediterranean cluster –Models with interaction for educational attainment**

|  |  |  |
| --- | --- | --- |
|  |  |  |
| VARIABLES | coef | Se |
|  |  |  |
|  |  |  |
| 10.cntry | 20.653** | (8.755) |
| 12.cntry | 56.683*** | (6.930) |
| year | 0.027*** | (0.004) |
| 7b.cntry#co.year | 0.000 | (0.000) |
| 10.cntry#c.year | -0.010** | (0.004) |
| 12.cntry#c.year | -0.028*** | (0.003) |
| 1.educ | 2.319 | (6.389) |
| 2.educ | 30.986*** | (7.639) |
| 7b.cntry#0b.educ | 0.000 | (0.000) |
| 7b.cntry#1o.educ | 0.000 | (0.000) |
| 7b.cntry#2o.educ | 0.000 | (0.000) |
| 10o.cntry#0b.educ | 0.000 | (0.000) |
| 10.cntry#1.educ | 0.705 | (8.228) |
| 10.cntry#2.educ | 5.266 | (12.532) |
| 12o.cntry#0b.educ | 0.000 | (0.000) |
| 12.cntry#1.educ | 12.428** | (5.276) |
| 12.cntry#2.educ | 13.185** | (5.900) |
| 0b.educ#co.year | 0.000 | (0.000) |
| 1.educ#c.year | -0.001 | (0.003) |
| 2.educ#c.year | -0.015*** | (0.004) |
| 7b.cntry#0b.educ#co.year | 0.000 | (0.000) |
| 7b.cntry#1o.educ#co.year | 0.000 | (0.000) |
| 7b.cntry#2o.educ#co.year | 0.000 | (0.000) |
| 10o.cntry#0b.educ#co.year | 0.000 | (0.000) |
| 10.cntry#1.educ#c.year | -0.000 | (0.004) |
| 10.cntry#2.educ#c.year | -0.003 | (0.006) |
| 12o.cntry#0b.educ#co.year | 0.000 | (0.000) |
| 12.cntry#1.educ#c.year | -0.006** | (0.003) |
| 12.cntry#2.educ#c.year | -0.006** | (0.003) |
| 51.region | -0.245*** | (0.003) |
| 52.region | -0.167*** | (0.002) |
| 53.region | -0.014*** | (0.005) |
| 54.region | 0.051*** | (0.004) |
| 55.region | 0.021*** | (0.004) |
| 56.region | 0.053*** | (0.003) |
| 57.region | -0.009* | (0.005) |
| 58.region | -0.117*** | (0.003) |
| 59.region | -0.188*** | (0.003) |
| 60.region | -0.212*** | (0.004) |
| 61.region | 0.194*** | (0.003) |
| 62.region | 0.015*** | (0.003) |
| 63.region | 0.274*** | (0.004) |
| 64.region | -0.316*** | (0.003) |
| 65.region | -0.107*** | (0.003) |
| 66.region | -0.331*** | (0.005) |
| 67.region | -0.061*** | (0.003) |
| 95.region | -0.081*** | (0.006) |
| 96.region | -0.240*** | (0.004) |
| 97.region | -0.345*** | (0.012) |
| 98.region | -0.207*** | (0.008) |
| 99.region | -0.208*** | (0.004) |
| 100.region | -0.051*** | (0.013) |
| 101.region | -0.260*** | (0.007) |
| 102.region | -0.354*** | (0.005) |
| 103.region | -0.112*** | (0.004) |
| 104.region | -0.230*** | (0.006) |
| 105.region | -0.483*** | (0.006) |
| 106.region | -0.231*** | (0.016) |
| 107o.region | - |  |
| 115.region | 0.057*** | (0.006) |
| 116.region | 0.161*** | (0.008) |
| 117.region | -0.237*** | (0.008) |
| 118.region | -0.013** | (0.006) |
| 119.region | -0.051*** | (0.007) |
| 120.region | 0.009 | (0.007) |
| 121.region | 0.122*** | (0.006) |
| 122.region | -0.105*** | (0.007) |
| 123.region | -0.173*** | (0.008) |
| 124.region | -0.014** | (0.007) |
| 125.region | -0.456*** | (0.011) |
| 126.region | -0.386*** | (0.008) |
| 127.region | -0.505*** | (0.009) |
| 128.region | -0.880*** | (0.012) |
| 129.region | -0.817*** | (0.010) |
| 130.region | -0.710*** | (0.008) |
| 131.region | -0.781*** | (0.012) |
| 132.region | -0.895*** | (0.008) |
| 133.region | -0.596*** | (0.008) |
| 134o.region | - |  |
| 32.age | 0.171*** | (0.012) |
| 37.age | 0.256*** | (0.017) |
| 42.age | 0.245*** | (0.022) |
| migrant | -0.240*** | (0.043) |
| parent | 0.083*** | (0.029) |
| 2.child | -0.215*** | (0.015) |
| 3.child | -0.281*** | (0.013) |
| 4.child | -0.328*** | (0.025) |
| 5.child | -0.494*** | (0.025) |
| 2.staciv | -0.276*** | (0.021) |
| 3.staciv | -0.079*** | (0.018) |
| 4.staciv | -0.300*** | (0.020) |
| 5.staciv | -0.485*** | (0.019) |
| delta of % regional PT | 1.392*** | (0.440) |
| 0b.educ#co.delta of % regional PT | 0.000 | (0.000) |
| 1.educ#c.delta of % regional PT | -0.136 | (0.514) |
| 2.educ#c.delta of % regional PT | -0.199 | (0.618) |
| delta of % regional temp. empl | -0.006 | (0.159) |
| delta of % regional self empl | 0.725*** | (0.246) |
| delta of % male youth unempl. | -0.437*** | (0.057) |
| Constant | -53.833*** | (7.532) |
|  |  |  |
| Observations | 1,520,964 |  |

**Mediterranean cluster –Models with interaction for presence of children**

|  |  |  |
| --- | --- | --- |
|  |  |  |
| VARIABLES | coef | se |
|  |  |  |
|  | . | (.) |
| 10.cntry | 20.403** | (8.532) |
| 12.cntry | 55.953*** | (6.719) |
| Year | 0.024*** | (0.003) |
| 7b.cntry#co.year | 0.000 | (0.000) |
| 10.cntry#c.year | -0.010** | (0.004) |
| 12.cntry#c.year | -0.028*** | (0.003) |
| 1.educ | 1.985 | (2.979) |
| 2.educ | 29.889*** | (2.339) |
| 7b.cntry#0b.educ | 0.000 | (0.000) |
| 7b.cntry#1o.educ | 0.000 | (0.000) |
| 7b.cntry#2o.educ | 0.000 | (0.000) |
| 10o.cntry#0b.educ | 0.000 | (0.000) |
| 10.cntry#1.educ | 0.716 | (8.080) |
| 10.cntry#2.educ | 5.407 | (10.785) |
| 12o.cntry#0b.educ | 0.000 | (0.000) |
| 12.cntry#1.educ | 12.642*** | (4.591) |
| 12.cntry#2.educ | 13.559** | (5.456) |
| 0b.educ#co.year | 0.000 | (0.000) |
| 1.educ#c.year | -0.001 | (0.001) |
| 2.educ#c.year | -0.014*** | (0.001) |
| 7b.cntry#0b.educ#co.year | 0.000 | (0.000) |
| 7b.cntry#1o.educ#co.year | 0.000 | (0.000) |
| 7b.cntry#2o.educ#co.year | 0.000 | (0.000) |
| 10o.cntry#0b.educ#co.year | 0.000 | (0.000) |
| 10.cntry#1.educ#c.year | -0.000 | (0.004) |
| 10.cntry#2.educ#c.year | -0.003 | (0.005) |
| 12o.cntry#0b.educ#co.year | 0.000 | (0.000) |
| 12.cntry#1.educ#c.year | -0.006*** | (0.002) |
| 12.cntry#2.educ#c.year | -0.007** | (0.003) |
| 2.child | -11.434** | (5.397) |
| 3.child | -8.858* | (5.304) |
| 4.child | -6.339 | (9.175) |
| 5.child | -5.420 | (7.943) |
| o.year | - |  |
| 1b.child#co.year | 0.000 | (0.000) |
| 2.child#c.year | 0.006** | (0.003) |
| 3.child#c.year | 0.004 | (0.003) |
| 4.child#c.year | 0.003 | (0.005) |
| 5.child#c.year | 0.002 | (0.004) |
| 51.region | -0.244*** | (0.003) |
| 52.region | -0.167*** | (0.002) |
| 53.region | -0.015*** | (0.005) |
| 54.region | 0.050*** | (0.004) |
| 55.region | 0.020*** | (0.003) |
| 56.region | 0.051*** | (0.003) |
| 57.region | -0.009* | (0.005) |
| 58.region | -0.118*** | (0.003) |
| 59.region | -0.190*** | (0.003) |
| 60.region | -0.214*** | (0.004) |
| 61.region | 0.194*** | (0.003) |
| 62.region | 0.014*** | (0.003) |
| 63.region | 0.272*** | (0.004) |
| 64.region | -0.318*** | (0.003) |
| 65.region | -0.109*** | (0.003) |
| 66.region | -0.333*** | (0.004) |
| 67.region | -0.064*** | (0.002) |
| 95.region | -0.081*** | (0.006) |
| 96.region | -0.240*** | (0.004) |
| 97.region | -0.345*** | (0.012) |
| 98.region | -0.208*** | (0.009) |
| 99.region | -0.208*** | (0.004) |
| 100.region | -0.051*** | (0.013) |
| 101.region | -0.261*** | (0.007) |
| 102.region | -0.354*** | (0.005) |
| 103.region | -0.113*** | (0.004) |
| 104.region | -0.231*** | (0.006) |
| 105.region | -0.483*** | (0.006) |
| 106.region | -0.231*** | (0.016) |
| 107o.region | - |  |
| 115.region | 0.056*** | (0.007) |
| 116.region | 0.161*** | (0.008) |
| 117.region | -0.240*** | (0.008) |
| 118.region | -0.014** | (0.006) |
| 119.region | -0.052*** | (0.008) |
| 120.region | 0.008 | (0.007) |
| 121.region | 0.122*** | (0.006) |
| 122.region | -0.105*** | (0.007) |
| 123.region | -0.171*** | (0.008) |
| 124.region | -0.012* | (0.007) |
| 125.region | -0.455*** | (0.011) |
| 126.region | -0.384*** | (0.008) |
| 127.region | -0.502*** | (0.009) |
| 128.region | -0.877*** | (0.012) |
| 129.region | -0.814*** | (0.009) |
| 130.region | -0.708*** | (0.008) |
| 131.region | -0.780*** | (0.012) |
| 132.region | -0.893*** | (0.008) |
| 133.region | -0.594*** | (0.008) |
| 134o.region | - |  |
| 32.age | 0.174*** | (0.013) |
| 37.age | 0.261*** | (0.017) |
| 42.age | 0.248*** | (0.022) |
| migrant | -0.238*** | (0.042) |
| parent | 0.084*** | (0.029) |
| 2.staciv | -0.274*** | (0.021) |
| 3.staciv | -0.076*** | (0.018) |
| 4.staciv | -0.290*** | (0.020) |
| 5.staciv | -0.485*** | (0.019) |
| delta of % regional PT | 1.194*** | (0.445) |
| 1b.child#co.delta of % regional PT | 0.000 | (0.000) |
| 2.child#c.delta of % regional PT | -0.180 | (0.397) |
| 3.child#c.delta of % regional PT | -0.623* | (0.322) |
| 4.child#c.delta of % regional PT | 0.703 | (0.720) |
| 5.child#c.delta of % regional PT | -0.061 | (0.580) |
| delta of % regional temp. empl | -0.013 | (0.159) |
| delta of % regional self empl | 0.735*** | (0.253) |
| delta of % male youth unempl. | -0.431*** | (0.058) |
| Constant | -47.251*** | (5.993) |
|  |  |  |
| Observations | 1,520,964 |  |

**Table 3** Probit models on women’s employment chances **Models with voluntary and involuntary PT**

**Mediterranean cluster –Models with voluntary and involuntary PT**

|  |  |  |
| --- | --- | --- |
|  |  |  |
| VARIABLES | coef | se |
|  |  |  |
|  |  |  |
| 10.cntry | 22.871** | (8.997) |
| 12.cntry | 57.563*** | (6.774) |
| year | 0.029*** | (0.003) |
| 7b.cntry#co.year | 0.000 | (0.000) |
| 10.cntry#c.year | -0.011** | (0.004) |
| 12.cntry#c.year | -0.029*** | (0.003) |
| 1.educ | 3.822 | (3.007) |
| 2.educ | 33.115*** | (2.169) |
| 7b.cntry#0b.educ | 0.000 | (0.000) |
| 7b.cntry#1o.educ | 0.000 | (0.000) |
| 7b.cntry#2o.educ | 0.000 | (0.000) |
| 10o.cntry#0b.educ | 0.000 | (0.000) |
| 10.cntry#1.educ | -0.285 | (8.351) |
| 10.cntry#2.educ | 3.920 | (11.377) |
| 12o.cntry#0b.educ | 0.000 | (0.000) |
| 12.cntry#1.educ | 13.287*** | (4.635) |
| 12.cntry#2.educ | 14.084** | (5.497) |
| 0b.educ#co.year | 0.000 | (0.000) |
| 1.educ#c.year | -0.002 | (0.001) |
| 2.educ#c.year | -0.016*** | (0.001) |
| 7b.cntry#0b.educ#co.year | 0.000 | (0.000) |
| 7b.cntry#1o.educ#co.year | 0.000 | (0.000) |
| 7b.cntry#2o.educ#co.year | 0.000 | (0.000) |
| 10o.cntry#0b.educ#co.year | 0.000 | (0.000) |
| 10.cntry#1.educ#c.year | 0.000 | (0.004) |
| 10.cntry#2.educ#c.year | -0.002 | (0.006) |
| 12o.cntry#0b.educ#co.year | 0.000 | (0.000) |
| 12.cntry#1.educ#c.year | -0.007*** | (0.002) |
| 12.cntry#2.educ#c.year | -0.007** | (0.003) |
| 51.region | -0.244*** | (0.003) |
| 52.region | -0.167*** | (0.002) |
| 53.region | -0.011** | (0.005) |
| 54.region | 0.053*** | (0.004) |
| 55.region | 0.021*** | (0.003) |
| 56.region | 0.055*** | (0.003) |
| 57.region | -0.007 | (0.005) |
| 58.region | -0.116*** | (0.003) |
| 59.region | -0.186*** | (0.003) |
| 60.region | -0.212*** | (0.004) |
| 61.region | 0.197*** | (0.003) |
| 62.region | 0.018*** | (0.003) |
| 63.region | 0.277*** | (0.004) |
| 64.region | -0.315*** | (0.003) |
| 65.region | -0.105*** | (0.003) |
| 66.region | -0.331*** | (0.005) |
| 67.region | -0.060*** | (0.003) |
| 95.region | -0.081*** | (0.006) |
| 96.region | -0.241*** | (0.004) |
| 97.region | -0.346*** | (0.012) |
| 98.region | -0.208*** | (0.008) |
| 99.region | -0.208*** | (0.004) |
| 100.region | -0.051*** | (0.013) |
| 101.region | -0.261*** | (0.007) |
| 102.region | -0.355*** | (0.005) |
| 103.region | -0.113*** | (0.005) |
| 104.region | -0.230*** | (0.006) |
| 105.region | -0.483*** | (0.006) |
| 106.region | -0.231*** | (0.016) |
| 107o.region | - |  |
| 115.region | 0.054*** | (0.007) |
| 116.region | 0.162*** | (0.007) |
| 117.region | -0.238*** | (0.008) |
| 118.region | -0.015** | (0.006) |
| 119.region | -0.052*** | (0.007) |
| 120.region | 0.010 | (0.007) |
| 121.region | 0.121*** | (0.006) |
| 122.region | -0.108*** | (0.007) |
| 123.region | -0.177*** | (0.009) |
| 124.region | -0.016** | (0.007) |
| 125.region | -0.463*** | (0.011) |
| 126.region | -0.390*** | (0.008) |
| 127.region | -0.508*** | (0.010) |
| 128.region | -0.887*** | (0.013) |
| 129.region | -0.824*** | (0.011) |
| 130.region | -0.718*** | (0.010) |
| 131.region | -0.787*** | (0.013) |
| 132.region | -0.903*** | (0.010) |
| 133.region | -0.605*** | (0.011) |
| 134o.region | - |  |
| 32.age | 0.171*** | (0.012) |
| 37.age | 0.256*** | (0.017) |
| 42.age | 0.245*** | (0.022) |
| migrant | -0.240*** | (0.043) |
| parent | 0.083*** | (0.029) |
| 2.staciv | -0.276*** | (0.021) |
| 3.staciv | -0.079*** | (0.018) |
| 4.staciv | -0.301*** | (0.020) |
| 5.staciv | -0.486*** | (0.019) |
| 2.child | -0.215*** | (0.015) |
| 3.child | -0.281*** | (0.013) |
| 4.child | -0.328*** | (0.025) |
| 5.child | -0.494*** | (0.025) |
| delta of % regional vol. partime | 1.554*** | (0.304) |
| delta of % regional invol. partime | 0.987*** | (0.323) |
| delta of % regional temp. empl | -0.006 | (0.166) |
| delta of % regional self empl | 0.731*** | (0.245) |
| delta of % male youth unempl. | -0.406*** | (0.063) |
| Constant | -56.929*** | (5.816) |
|  |  |  |
| Observations | 1,520,964 |  |

**Continental cluster –Models with involuntary PT**

|  | (1) | (2) |
| --- | --- | --- |
|  | emp |  |
| VARIABLES | coef | se |
|  |  |  |
|  |  |  |
| 2.cntry | 9.377 | (8.370) |
| 3.cntry | 1.670 | (11.27) |
| year | 0.0138*** | (0.00302) |
| 1b.cntry#co.year | 0 | (0) |
| 2.cntry#c.year | -0.00499 | (0.00418) |
| 3.cntry#c.year | -0.00105 | (0.00562) |
| 1.educ | -27.49*** | (2.454) |
| 2.educ | 36.66*** | (7.098) |
| 1b.cntry#0b.educ | 0 | (0) |
| 1b.cntry#1o.educ | 0 | (0) |
| 1b.cntry#2o.educ | 0 | (0) |
| 2o.cntry#0b.educ | 0 | (0) |
| 2.cntry#1.educ | 26.48*** | (3.600) |
| 2.cntry#2.educ | -34.45*** | (8.092) |
| 3o.cntry#0b.educ | 0 | (0) |
| 3.cntry#1.educ | 9.763 | (8.267) |
| 3.cntry#2.educ | -45.88*** | (12.26) |
| 0b.educ#co.year | 0 | (0) |
| 1.educ#c.year | 0.0139*** | (0.00122) |
| 2.educ#c.year | -0.0179*** | (0.00352) |
| 1b.cntry#0b.educ#co.year | 0 | (0) |
| 1b.cntry#1o.educ#co.year | 0 | (0) |
| 1b.cntry#2o.educ#co.year | 0 | (0) |
| 2o.cntry#0b.educ#co.year | 0 | (0) |
| 2.cntry#1.educ#c.year | -0.0131*** | (0.00180) |
| 2.cntry#2.educ#c.year | 0.0174*** | (0.00402) |
| 3o.cntry#0b.educ#co.year | 0 | (0) |
| 3.cntry#1.educ#c.year | -0.00481 | (0.00411) |
| 3.cntry#2.educ#c.year | 0.0229*** | (0.00610) |
| 2.regio | -0.189*** | (0.0119) |
| 3.regio | -0.0746*** | (0.00636) |
| 4.regio | 0.248*** | (0.0286) |
| 5.regio | 0.485*** | (0.0273) |
| 6.regio | 0.152*** | (0.0303) |
| 7.regio | 0.219*** | (0.0309) |
| 8.regio | 0.0821*** | (0.0239) |
| 9.regio | 0.0247 | (0.0263) |
| 10.regio | 0.195*** | (0.0239) |
| 11.regio | 0.540*** | (0.0359) |
| 12.regio | 0.458*** | (0.0323) |
| 13.regio | 0.229*** | (0.0328) |
| 14o.regio | - |  |
| 15.regio | 0.188*** | (0.00979) |
| 16.regio | 0.152*** | (0.00901) |
| 17.regio | -0.0990*** | (0.0182) |
| 18.regio | 0.0726*** | (0.00379) |
| 19.regio | -0.0357* | (0.0200) |
| 20.regio | 0.0254 | (0.0177) |
| 21.regio | 0.127*** | (0.0127) |
| 22.regio | -0.109*** | (0.00826) |
| 23.regio | 0.0292*** | (0.00981) |
| 24.regio | -0.00619 | (0.0115) |
| 25.regio | 0.101*** | (0.0106) |
| 26.regio | 0.0190 | (0.0117) |
| 27.regio | -0.00737** | (0.00322) |
| 28.regio | -0.0278*** | (0.00912) |
| 29.regio | 0.0650*** | (0.00875) |
| 30o.regio | - |  |
| 32.age | 0.0912*** | (0.0195) |
| 37.age | 0.0931*** | (0.0273) |
| 42.age | 0.0709** | (0.0331) |
| migrant | -0.453*** | (0.0560) |
| parent | 0.224*** | (0.0384) |
| 2.staciv | 0.112** | (0.0565) |
| 3.staciv | 0.00659 | (0.0184) |
| 4.staciv | 0.169*** | (0.0546) |
| 5.staciv | -0.0566 | (0.0432) |
| 2.child | -0.135*** | (0.0202) |
| 3.child | -0.378*** | (0.0490) |
| 4.child | -0.362*** | (0.0290) |
| 5.child | -0.726*** | (0.0487) |
| delta of % regional invol. partime | -1.085* | (0.591) |
| delta of % regional temp. empl | -0.529 | (0.373) |
| delta of % regional self. empl | 0.0313 | (0.266) |
| delta of % male youth unempl. | -0.0663 | (0.0810) |
| Constant | -26.73*** | (6.047) |
|  |  |  |
| Observations | 638,167 |  |

**Continental cluster –Models with voluntary PT**

|  | (1) | (2) |
| --- | --- | --- |
|  | emp |  |
| VARIABLES | coef | se |
|  |  |  |
|  |  |  |
| 2.cntry | 3.361 | (6.782) |
| 3.cntry | -10.94 | (11.33) |
| year | 0.00268 | (0.00312) |
| 1b.cntry#co.year | 0 | (0) |
| 2.cntry#c.year | -0.00201 | (0.00340) |
| 3.cntry#c.year | 0.00523 | (0.00565) |
| 1.educ | -27.59*** | (2.658) |
| 2.educ | 35.26*** | (7.108) |
| 1b.cntry#0b.educ | 0 | (0) |
| 1b.cntry#1o.educ | 0 | (0) |
| 1b.cntry#2o.educ | 0 | (0) |
| 2o.cntry#0b.educ | 0 | (0) |
| 2.cntry#1.educ | 26.12*** | (3.819) |
| 2.cntry#2.educ | -34.65*** | (8.190) |
| 3o.cntry#0b.educ | 0 | (0) |
| 3.cntry#1.educ | 11.08 | (8.084) |
| 3.cntry#2.educ | -43.06*** | (12.44) |
| 0b.educ#co.year | 0 | (0) |
| 1.educ#c.year | 0.0139*** | (0.00132) |
| 2.educ#c.year | -0.0172*** | (0.00353) |
| 1b.cntry#0b.educ#co.year | 0 | (0) |
| 1b.cntry#1o.educ#co.year | 0 | (0) |
| 1b.cntry#2o.educ#co.year | 0 | (0) |
| 2o.cntry#0b.educ#co.year | 0 | (0) |
| 2.cntry#1.educ#c.year | -0.0129*** | (0.00190) |
| 2.cntry#2.educ#c.year | 0.0175*** | (0.00406) |
| 3o.cntry#0b.educ#co.year | 0 | (0) |
| 3.cntry#1.educ#c.year | -0.00547 | (0.00402) |
| 3.cntry#2.educ#c.year | 0.0215*** | (0.00619) |
| 2.regio | -0.178*** | (0.00980) |
| 3.regio | -0.0720*** | (0.00601) |
| 4.regio | 0.255*** | (0.0273) |
| 5.regio | 0.492*** | (0.0261) |
| 6.regio | 0.156*** | (0.0294) |
| 7.regio | 0.220*** | (0.0303) |
| 8.regio | 0.0984*** | (0.0215) |
| 9.regio | 0.0184 | (0.0270) |
| 10.regio | 0.196*** | (0.0234) |
| 11.regio | 0.545*** | (0.0345) |
| 12.regio | 0.465*** | (0.0306) |
| 13.regio | 0.241*** | (0.0310) |
| 14o.regio | - |  |
| 15.regio | 0.193*** | (0.0106) |
| 16.regio | 0.151*** | (0.00880) |
| 17.regio | -0.110*** | (0.0167) |
| 18.regio | 0.0651*** | (0.00354) |
| 19.regio | -0.0320 | (0.0213) |
| 20.regio | 0.0379* | (0.0213) |
| 21.regio | 0.127*** | (0.0125) |
| 22.regio | -0.130*** | (0.00800) |
| 23.regio | 0.0293*** | (0.00970) |
| 24.regio | -0.00409 | (0.0118) |
| 25.regio | 0.104*** | (0.0108) |
| 26.regio | 0.0134 | (0.0115) |
| 27.regio | -0.0137*** | (0.00334) |
| 28.regio | -0.0443*** | (0.00738) |
| 29.regio | 0.0694*** | (0.00927) |
| 30o.regio | - |  |
| 32.age | 0.0907*** | (0.0195) |
| 37.age | 0.0922*** | (0.0273) |
| 42.age | 0.0699** | (0.0330) |
| migrant | -0.452*** | (0.0558) |
| parent | 0.225*** | (0.0386) |
| 2.staciv | 0.110* | (0.0562) |
| 3.staciv | 0.00521 | (0.0181) |
| 4.staciv | 0.167*** | (0.0540) |
| 5.staciv | -0.0578 | (0.0430) |
| 2.child | -0.135*** | (0.0201) |
| 3.child | -0.378*** | (0.0490) |
| 4.child | -0.362*** | (0.0289) |
| 5.child | -0.726*** | (0.0488) |
| delta of % regional vol. partime | 1.115*** | (0.246) |
| delta of % regional invol. partime | -0.270 | (0.522) |
| delta of % regional temp. empl | -1.117*** | (0.354) |
| delta of % regional self empl | 0.245 | (0.326) |
| delta of % male youth unempl. | -0.123 | (0.0816) |
| Constant | -4.525 | (6.219) |
|  |  |  |
| Observations | 638,167 |  |

**Continental cluster, Probit Instrumental variable model (M4)**

|  | (1) | (2) |
| --- | --- | --- |
| VARIABLES | emp | emp |
|  |  |  |
| emp |  |  |
| delta % vol. regional partime | 1.487** | (0.736) |
| 2.cntry | 1.354 | (7.515) |
| 3.cntry | -15.13 | (15.48) |
| year | -0.000996 | (0.00735) |
| 1b.cntry#co.year | 0 | (0) |
| 2.cntry#c.year | -0.00101 | (0.00375) |
| 3.cntry#c.year | 0.00732 | (0.00772) |
| 1.educ | -27.70*** | (2.784) |
| 2.educ | 34.80*** | (7.280) |
| 1b.cntry#0b.educ | 0 | (0) |
| 1b.cntry#1o.educ | 0 | (0) |
| 1b.cntry#2o.educ | 0 | (0) |
| 2o.cntry#0b.educ | 0 | (0) |
| 2.cntry#1.educ | 26.13*** | (3.917) |
| 2.cntry#2.educ | -34.61*** | (8.285) |
| 3o.cntry#0b.educ | 0 | (0) |
| 3.cntry#1.educ | 11.54 | (8.207) |
| 3.cntry#2.educ | -42.17*** | (12.71) |
| 0b.educ#co.year | 0 | (0) |
| 1.educ#c.year | 0.0140*** | (0.00138) |
| 2.educ#c.year | -0.0170*** | (0.00361) |
| 1b.cntry#0b.educ#co.year | 0 | (0) |
| 1b.cntry#1o.educ#co.year | 0 | (0) |
| 1b.cntry#2o.educ#co.year | 0 | (0) |
| 2o.cntry#0b.educ#co.year | 0 | (0) |
| 2.cntry#1.educ#c.year | -0.0129*** | (0.00195) |
| 2.cntry#2.educ#c.year | 0.0175*** | (0.00411) |
| 3o.cntry#0b.educ#co.year | 0 | (0) |
| 3.cntry#1.educ#c.year | -0.00570 | (0.00408) |
| 3.cntry#2.educ#c.year | 0.0211*** | (0.00632) |
| 2.regio | -0.174*** | (0.0132) |
| 3.regio | -0.0711*** | (0.00702) |
| 4.regio | 0.257*** | (0.0290) |
| 5.regio | 0.494*** | (0.0278) |
| 6.regio | 0.157*** | (0.0303) |
| 7.regio | 0.220*** | (0.0303) |
| 8.regio | 0.104*** | (0.0283) |
| 9.regio | 0.0164 | (0.0258) |
| 10.regio | 0.196*** | (0.0236) |
| 11.regio | 0.547*** | (0.0355) |
| 12.regio | 0.468*** | (0.0323) |
| 13.regio | 0.245*** | (0.0354) |
| 14o.regio | - |  |
| 15.regio | 0.195*** | (0.0106) |
| 16.regio | 0.151*** | (0.00882) |
| 17.regio | -0.114*** | (0.0203) |
| 18.regio | 0.0624*** | (0.00728) |
| 19.regio | -0.0309 | (0.0208) |
| 20.regio | 0.0420** | (0.0201) |
| 21.regio | 0.127*** | (0.0125) |
| 22.regio | -0.138*** | (0.0188) |
| 23.regio | 0.0295*** | (0.00969) |
| 24.regio | -0.00329 | (0.0117) |
| 25.regio | 0.105*** | (0.0109) |
| 26.regio | 0.0114 | (0.0127) |
| 27.regio | -0.0159** | (0.00626) |
| 28.regio | -0.0500*** | (0.00745) |
| 29.regio | 0.0710*** | (0.00957) |
| 30o.regio | - |  |
| 32.age | 0.0906*** | (0.0195) |
| 37.age | 0.0919*** | (0.0274) |
| 42.age | 0.0695** | (0.0330) |
| migrant | -0.452*** | (0.0559) |
| parent | 0.225*** | (0.0386) |
| 2.staciv | 0.110* | (0.0563) |
| 3.staciv | 0.00479 | (0.0180) |
| 4.staciv | 0.166*** | (0.0541) |
| 5.staciv | -0.0582 | (0.0431) |
| 2.child | -0.135*** | (0.0201) |
| 3.child | -0.378*** | (0.0490) |
| 4.child | -0.362*** | (0.0289) |
| 5.child | -0.726*** | (0.0487) |
| delta of % regional temp. empl | -1.383** | (0.592) |
| delta of % regional self empl | 0.319 | (0.401) |
| delta of % male youth unempl. | -0.143 | (0.100) |
| delta % inv. Regional partime |  |  |
|  |  |  |
|  |  |  |
| Constant | 2.854 | (14.74) |
|  |  |  |
| Observations | 638,167 |  |
